# Supplementary material
Source: HighWire-hosted journal article supplement (https://drc.bmj.com/content/9/1/e001924)
Supplement: inline-supplementary-material-1 [file inline-supplementary-material-1.pdf]

**Appendix A: Detailed search strategy used for PubMed database**

| Search | Query                                                                                                                                                                                                                                                                                                                                                                                                                                                                                                                                                                                                                                                                                                                                                                                                                                                                                                                                                                                                                                                                                                                                                                                                                                                                                                                                                                                                                                                                                                                                                                                                                                                                                                                                                                                                                                                                                                                                                                                                                                                                                                                                                                                                                                                  |
|--------|--------------------------------------------------------------------------------------------------------------------------------------------------------------------------------------------------------------------------------------------------------------------------------------------------------------------------------------------------------------------------------------------------------------------------------------------------------------------------------------------------------------------------------------------------------------------------------------------------------------------------------------------------------------------------------------------------------------------------------------------------------------------------------------------------------------------------------------------------------------------------------------------------------------------------------------------------------------------------------------------------------------------------------------------------------------------------------------------------------------------------------------------------------------------------------------------------------------------------------------------------------------------------------------------------------------------------------------------------------------------------------------------------------------------------------------------------------------------------------------------------------------------------------------------------------------------------------------------------------------------------------------------------------------------------------------------------------------------------------------------------------------------------------------------------------------------------------------------------------------------------------------------------------------------------------------------------------------------------------------------------------------------------------------------------------------------------------------------------------------------------------------------------------------------------------------------------------------------------------------------------------|
| #1     | Search (((((((((((("diabetes mellitus" OR "diabetes mellitus/blood sugar")) OR "type 2 diabetes") OR ("glucose intolerance" OR "glucose intolerance/blood" OR "glucose intolerance/complications" OR "glucose intolerance/diabetes" OR "glucose intolerance/diabetes mellitus" OR "glucose intolerance/insulin resistance" OR "glucose intolerance/metabolism" OR "glucose intolerance/type 2 diabetes" OR "glucose intolerance diabetes mellitus" OR "glucose intolerance impaired glucose tolerance" OR "glucose intolerance insulin resistance" OR "glucose intolerance type 2 diabetes" OR "glucose intolerance, diabetes mellitus" OR "glucose intolerance, insulin resistance"))) OR (("insulin resistance" OR "insulin resistance/diabetes" OR "insulin resistance/diabetes mellitus" OR "insulin resistance/ethnology" OR "insulin resistance/glucose intolerance" OR "insulin resistance/hyperglycemia" OR "insulin resistance/hyperinsulinaemia" OR "insulin resistance/insulin" OR "insulin resistance/metabolic" OR "insulin resistance/type 2 diabetes" OR "insulin resistance/type 2 diabetes mellitus" OR "insulin resistance/type ii diabetes")))) OR "diabetes") OR (("hyperglycemia" OR "hyperglycemia/blood" OR "hyperglycemia/diabetes mellitus")) OR (("obesity" OR "obesity/abdominal" OR "obesity/adipositas" OR "obesity/diabetes")) OR (("blood glucose" OR "blood glucose/insulin")) OR (("non insulin dependant diabetes" OR "non insulin dependent diabetes mellitus" OR "non insulin dependent diabetes" OR "non insulin dependent diabetes mellitus 2")) OR (("metabolic syndrome" OR "metabolic syndrome/diabetes" OR "metabolic syndrome/diabetes mellitus")) OR (("obesity" OR "obesity/body mass index" OR "obesity/body mass index bmi" OR "obesity/diabetes" OR "obesity/diabetes/cardiovascular" OR "obesity/diabetes mellitus" OR "obesity/diabetes related")) OR (("hypertension" OR "hypertension/blood pressure" OR "hypertension/diabetes" OR "hypertension/diabetes/cardiovascular" OR "hypertension/diabetes/hyperlipidemia" OR "hypertension/diabetes mellitus")) OR "triglycerides") OR "lipids") OR (("triglycerides" OR "triglycerides/blood" OR "triglycerides/glucose" OR "triglycerides/glycemia")) |
| #2     | Search (((((((((((("diabetes management" OR "diabetes management adherence" OR "diabetes management and education" OR "diabetes management behaviors" OR "diabetes management intervention" OR "diabetes management interventions")) OR "diabetes prevention") OR "diabetes improvement") OR "prevention") OR "secondary prevention") OR (("lifestyle intervention" OR "lifestyle intervention approach")) OR "non pharmaceutical interventions") OR "behavioral interventions program") OR "behaviour") OR (("healthy behaviour" OR "healthy behaviour change")) OR (("physical activity" OR "physical activity/behavior" OR "physical activity/diet" OR "physical activity/duration" OR "physical activity/education" OR "physical activity/exercise training")) OR (("peer support intervention" OR "peer support interventions" OR "peer support meetings" OR "peer support model" OR "peer support models" OR "peer support network" OR "peer support networks"))                                                                                                                                                                                                                                                                                                                                                                                                                                                                                                                                                                                                                                                                                                                                                                                                                                                                                                                                                                                                                                                                                                                                                                                                                                                                                 |
| #3     | Search (((((((("migrants" OR "migrants/africa" OR "migrants/ethnic" OR "migrants/mobile" OR "migrants/refugee" OR "migrants/refugees" OR "migrants and ethnic minorities" OR "migrants and refugees" OR "migrants and transients" OR "migrants descendants")) OR "migration") OR ("migrant" OR "migrant/community" OR "migrant/ethnic" OR "migrant/ethnic groups" OR "migrant/immigrant" OR "migrant and mobile populations" OR "migrant and poverty" OR "migrant and refugee" OR "migrant and refugee health" OR "migrant asian indian" OR "migrant asian indians" OR "migrant asian populations")) OR ("industrialized" OR "industrialized counties" OR "industrialized countries" OR "industrialized country" OR "industrialized country setting")) OR ("high income country" OR "high income developed countries" OR "high income economies")) OR ("developed country" OR "developed country setting")) OR ("developed countries" OR "developed countries 1974 97"))                                                                                                                                                                                                                                                                                                                                                                                                                                                                                                                                                                                                                                                                                                                                                                                                                                                                                                                                                                                                                                                                                                                                                                                                                                                                               |
| #4     | Search (#1 AND #2)                                                                                                                                                                                                                                                                                                                                                                                                                                                                                                                                                                                                                                                                                                                                                                                                                                                                                                                                                                                                                                                                                                                                                                                                                                                                                                                                                                                                                                                                                                                                                                                                                                                                                                                                                                                                                                                                                                                                                                                                                                                                                                                                                                                                                                     |
| #5     | Search (#3 AND #4)                                                                                                                                                                                                                                                                                                                                                                                                                                                                                                                                                                                                                                                                                                                                                                                                                                                                                                                                                                                                                                                                                                                                                                                                                                                                                                                                                                                                                                                                                                                                                                                                                                                                                                                                                                                                                                                                                                                                                                                                                                                                                                                                                                                                                                     |
| #6     | Search: Filters: Clinical Trial; Journal Article; Pragmatic Clinical Trial; Randomized Controlled Trial; Full text; Publication date from 2000/01/01 to 2019/08/31; Humans; English; Adult: 19+ years                                                                                                                                                                                                                                                                                                                                                                                                                                                                                                                                                                                                                                                                                                                                                                                                                                                                                                                                                                                                                                                                                                                                                                                                                                                                                                                                                                                                                                                                                                                                                                                                                                                                                                                                                                                                                                                                                                                                                                                                                                                  |
