# Supplementary material
Source: HighWire-hosted journal article supplement (https://drc.bmj.com/content/9/1/e001924)
Supplement: inline-supplementary-material-3 [file inline-supplementary-material-3.pdf]

**Table 2. Assessment of quality (DM management studies) as determined by use of the national collaborating centre for methods and tools "Quality assessment tools for intervention studies"**

| Author                               | Selection | Study design | Blinding | Data collection method | Drop out and withdrawal | Intervention integrity | Confounders | Analyses | Global ratings |
|--------------------------------------|-----------|--------------|----------|------------------------|-------------------------|------------------------|-------------|----------|----------------|
| Lorig et al 2008, USA                | Moderate  | Moderate     | Moderate | Strong                 | Strong                  | Strong                 | Moderate    | Strong   | Moderate       |
| Thom et al., 2013, USA               | Weak      | Moderate     | Weak     | Moderate               | Moderate                | Moderate               | Strong      | Strong   | Moderate       |
| Safford et al., 2013, USA            | Moderate  | Strong       | Moderate | Moderate               | Moderate                | Moderate               | Strong      | Strong   | Moderate       |
| Lujan et al., 2007, USA              | Moderate  | Moderate     | Weak     | Moderate               | Weak                    | Moderate               | Weak        | Moderate | Moderate       |
| Long et al., 2012, USA               | Weak      | Moderate     | Weak     | Moderate               | Moderate                | Weak                   | Weak        | Moderate | Weak           |
| Culica et al., 2008, USA             | Weak      | Weak         | Weak     | Moderate               | Moderate                | Moderate               | Moderate    | Moderate | Weak           |
| Kangovi et al., 2017, USA            | Moderate  | Moderate     | Weak     | Moderate               | Weak                    | Moderate               | Moderate    | Strong   | Moderate       |
| Frosch et al., 2011, USA             | Weak      | Moderate     | Weak     | Moderate               | Strong                  | Moderate               | Strong      | Moderate | Moderate       |
| Lima et al., 2017, Spain             | Moderate  | Moderate     | Moderate | Weak                   | Weak                    | Moderate               | Moderate    | Moderate | Moderate       |
| Tsimikas et al., 2011, USA           | Weak      | Moderate     | Moderate | Weak                   | Strong                  | Moderate               | Weak        | Moderate | Moderate       |
| Keyserling et al., 2002, USA         | Weak      | Moderate     | Weak     | Moderate               | Strong                  | Strong                 | Weak        | Strong   | Weak           |
| Brown et al., 2002, USA              | Weak      | Moderate     | Weak     | Moderate               | Moderate                | Moderate               | Moderate    | Moderate | Moderate       |
| Brown et al., 2005, USA              | Moderate  | Moderate     | Weak     | Moderate               | Moderate                | Moderate               | Strong      | Strong   | Moderate       |
| O'Hare et al., 2004, UK              | Moderate  | Moderate     | Weak     | Moderate               | Moderate                | Moderate               | Strong      | Moderate | Moderate       |
| Bellary et al., 2008, UK             | Moderate  | Moderate     | Weak     | Moderate               | Moderate                | Moderate               | Strong      | Moderate | Moderate       |
| Middelkoop et al., 2001, Netherlands | Poor      | Moderate     | Weak     | Moderate               | Moderate                | Moderate               | Weak        | Moderate | Moderate       |
| Islam et al., 2018, USA              | Moderate  | Moderate     | Weak     | Moderate               | Moderate                | Moderate               | Weak        | Moderate | Moderate       |
