# Supplementary material
Source: HighWire-hosted journal article supplement (https://drc.bmj.com/content/9/1/e001924)
Supplement: inline-supplementary-material-4 [file inline-supplementary-material-4.pdf]

**Table 3. Effectiveness of the interventions to manage diabetes among migrants and ethnic minorities living in industrialized countries**

| Author, (Year), Country   | Objective                                                                                                                                                          | Follow up                 | Outcome Measures Baseline                                                                                                                                                                                                                      | Outcome Measures at follow up                                                                                                                                                                                                                                                               | Difference/ conclusion                                                                                                                                 |
|---------------------------|--------------------------------------------------------------------------------------------------------------------------------------------------------------------|---------------------------|------------------------------------------------------------------------------------------------------------------------------------------------------------------------------------------------------------------------------------------------|---------------------------------------------------------------------------------------------------------------------------------------------------------------------------------------------------------------------------------------------------------------------------------------------|--------------------------------------------------------------------------------------------------------------------------------------------------------|
| Lorig et al 2008, USA     | Assess effectiveness of Spanish Diabetes Self-Management Program (SDSMP) on health status, health behaviors, and self-efficacy                                     | 6 and 18 months           | HbA1c: Int. 7.44 (2.00); Cont: 7.38 (1.87)<br>Insulin use: Int. 8.7% vs Cont. 12.1%                                                                                                                                                            | HbA1c Changed 6 months: Int.: 0.408 (1.42); Cont: 0.050 (1.57)<br>Self-efficacy improved in int. group, compared to controls.<br>No differences between groups in health behaviors, BMI, insulin use, or health care utilization<br>At 18 mths: Int participants reduced mean HbA1c -0.319, | The SDSMP demonstrated effectiveness in lowering A1C and improving health status.<br>Reinforcement of telephone calls did not add to its effectiveness |
| Thom et al., 2013, USA    | Assess whether clinic-based peer health coaching, compared with usual care, improves glycaemic control for low-income patients who have poorly controlled diabetes | 6 months                  | HbA1c %: 10.14 (2.01) vs 9.84 (1.95);<br>LDC-C: 98.8 (34.2) vs 95.7 (35.8);<br>BMI: 35.0 (8.3) vs 32.5 (8.5); SBP: 143.0 (23.9) vs 143.4(22.3)<br>Hypertension: 88.5 vs 77.5%;<br>Hyperlipidemia: 69.6 vs 68.2<br>Insulin use: 60.1% vs. 50.0% | 6 mth follow up: HbA1c: 8.98 (2.0) vs 9.55 (2.3); LDL-C: 90.9 (27.8) vs 93.7 (37.4); SBP: 144.2 (20.1) vs 139.7 (24.1); BMI: 35.0 (8.2) vs 32.8 (8.6)                                                                                                                                       | Peer health coaching improved diabetes control in adults of low-income primary care patients                                                           |
| Safford et al., 2013, USA | Assess effect of an innovative peer-coaching intervention plus brief education vs brief education alone on diabetes outcomes                                       | 10 months                 | HbA1c: 8.0 (2.1) vs 7.9 (1.9); BMI Int vs. Cont: 36.5 (7.7) vs. 36.0 (9.1), SBP: 134.6 (21.7) vs 135.8 (21.2); DM distress scores: 2.1 (1.2) vs 2.1 (1.2)<br>Insulin use: 39.9% vs 39.1%                                                       | Changes in outcomes:<br>HbA1c: -0.004 (1.5) vs. 0.070 (1.3); BMI: 36.27 vs. 35.51; SBP: -0.41 (21.3) vs -1.88 (22.8); DM distress: -0.13 (1.2) vs -0.29 (1.1)                                                                                                                               | Telephone-delivered peer coaching held promise to improve health for individuals with diabetes living in under-resourced areas                         |
| Lujan et al., 2007, USA   | Assess effectiveness of promoters (community lay workers) led intervention on T2 diabetes management                                                               | 6 months                  | HbA1c: 8.21 (2.2) vs 7.71 (1.49); DM health belief measure scores: 56.4 (12.2) vs 57.0 (10.6)                                                                                                                                                  | HbA1c: 7.76 (1.87) vs 8.01(1.8);<br>DM health belief measure scores: 54.6 (8.4) vs 50.8 (13.6)                                                                                                                                                                                              | Peer support intervention was effective in improving diabetes outcomes among Mexican Americans                                                         |
| Long et al., 2012, USA    | Determine if peer mentors intervention is superior to usual care                                                                                                   | 3 weeks                   | HbA1c: Int. 9.8 (1.8) vs Cont. 9.9 (1.6);<br>Self-reported adherence: 79% vs 67%<br>Insulin use: 71% vs. 72%                                                                                                                                   | HbA1c: 8.7% vs. 9.8%                                                                                                                                                                                                                                                                        | Peer mentorship improved glucose control in a cohort of African American Veterans with diabetes.                                                       |
| Culica et al., 2008, USA  | Determine effectiveness of community health worker for diabetes self-management compared to other programs                                                         | 6 and 12 months follow up | HbA1c and SD: Full parti: 8.14 (1.65) vs Partial parti: 7.9, (2.00)<br>BMI: 31.22 (5.99) vs 32.73 (6.59)<br>DBP: 79.71 (8.79) vs 80.11 (10.23)<br>SBP: 120.46 (11.9) vs 124.79 (12.26)                                                         | 12 months: HbA1c: 7.00 (1.06) vs 7.45 (1.35)<br>BMI: 31.12 (6.22) vs 32.52 (6.30)<br>DBP: 76.64 (9.56) vs 75.88 (11.26)<br>SBP: 122.09 (13.77) vs 122.94 (14.42)                                                                                                                            | The significant improvement in HbA1c observed in patients who completed one year of CoDE delivered by community health workers                         |
| Kangovi et al., 2017, USA | Determine effectiveness of CHW led intervention among people with multiple chronic conditions                                                                      | 6 months                  | Plus CHW vs goal setting only. HbA1c: 8.7 vs 9.0; BMI 40.2 vs 39; SBP: 139.6 vs 146.2                                                                                                                                                          | Plus CHW vs goal setting only. HbA1c: 8.3 vs 8.9; BMI: 40.2 vs 38.9; SBP: 139.6 vs 135                                                                                                                                                                                                      | A standardized CHW intervention improved chronic disease control, mental health, quality of care, and hospitalizations among Acrican-                  |

|                              |                                                                                                                                                                                                        |                           |                                                                                                                                                                                                                     |                                                                                                                                                                                                                                                                                                 | Americans                                                                                                                                                                   |
|------------------------------|--------------------------------------------------------------------------------------------------------------------------------------------------------------------------------------------------------|---------------------------|---------------------------------------------------------------------------------------------------------------------------------------------------------------------------------------------------------------------|-------------------------------------------------------------------------------------------------------------------------------------------------------------------------------------------------------------------------------------------------------------------------------------------------|-----------------------------------------------------------------------------------------------------------------------------------------------------------------------------|
| Frosch et al., 2011, USA     | Assess effectiveness of ongoing telephone support for patients with diabetes among socially and economically disadvantaged African-American and Latino patients                                        | 6 months                  | HbA1c: 9.4 (1.9) vs 9.8 (2.1); BMI: 33.3 (8.0) vs 32.8 (7.4); SBP: 127.6 (17.3) vs 127.7 (17.2)                                                                                                                     | HbA1c: 8.9 (0.19) [8.6-9.3] vs 9.2 (0.19) [8.8-9.6]; BMI: 33.4 (0.76) [31.9-34.9] vs 32.9 (0.76) [31.4-34.4]; SBP: 129.1 (1.9) [125.4-132.8] vs 128.2 (1.9) [124.5-131.9]; DBP: 74.3 (1.0) [72.3-76.3] vs 73.6 (1.0) [71.6-75.6]                                                                | No significant effect of the experimental intervention compared with the control condition. The dose of intervention provided was less than in previously published studies |
| Lima et al., 2017, Spain     | Assess patient-practitioner communication compared to usual care in improving diabetes self-management                                                                                                 | 12 months                 | HbA1c: 8.89 (0.18) vs 8.93 (0.14); HDL 42.42 (2.37) vs 51.47 (3.38); LDL: 112.53 (6.36) vs 122.53 (7.90); SBP: 132.26 (2.98) vs 125.36 (4.37); DBP: 78.00 (1.42) vs 75.14 (2.84); BMI: 33.81 (0.85) vs 33.51 (1.40) | HbA1c: 8.19 (0.15) vs 8.28 (0.16); HDL 44.34 (1.52) vs 52.34 (2.68); LDL: 119.07 (5.45) vs 121.95 (4.58); BMI: 32.69 (2.94) vs 32.53 (1.46); SBP: 132.25 (2.47) vs 132.4 (2.09); DBP 77.72 (1.46) vs 78.72 (72.72)                                                                              | A modest benefit in glycaemic control compared with usual care, although no effect was observed in secondary outcomes.                                                      |
| Tsimikas et al., 2011, USA   | Assess effect of a culturally sensitive diabetes self-management education program using peer-educator format among Mexican-Americans                                                                  | 4 months                  | HbA1c (%): 10.5 (1.7) vs 10.3 (1.7); SBP: 123.9 (15.5) vs 121.2 (17.5); DBP: 74.8 (7.7) vs 75.1 (7.9); BMI 30.9 (6.3) vs 32.14 (5.9)                                                                                | 4 months FU:<br>HbA1c: 9.0 (1.9) vs 9.1 (1.9); SBP: 119.6 (13.6) vs 121.7 (17.9); DBP: 73.1 (8.1) vs 74.7 (9.7); BMI: 30.6 (6.0) vs 32.3 (6.3)<br>10 months FU:<br>HbA1c: 9.1 (2.0) vs 9.7 (2.3); SBP 118.9 (14.8) vs 119.3 (16.6); DBP: 71.8 (8.0) vs 74.8 (8.1); BMI 30.9 (6.0) vs 31.7 (6.4) | Culturally sensitive, peer-led education, demonstrated improvement in glucose and metabolic control indicating that this low-cost self-management education was effective   |
| Keyserling et al., 2002, USA | Assess effectiveness of culturally appropriate clinic- and community-based intervention for African-American women with T2DM                                                                           | 6 and 12 months follow up | Mean PA (kcal/day): Group A, B C: 342; 336; 321<br>Mean BMI: 36.2; 34.6; 36.5<br>Mean HbA1c: 10.8; 11.1; 11.3<br>Mean total kcal/day 2,053; 2,041; 2,056<br>Insulin use: 43.3%; 40.9%; 41.8%                        | At 12 months: Mean PA (kcal/day): Group A, B C: 364; 322; 297<br>Mean HbA1c: 10.8; 10.9; 10.7                                                                                                                                                                                                   | The intervention was associated with a modest enhancement of PA and was acceptable to participants.                                                                         |
| Brown et al., 2002, USA      | Determine effects of a culturally competent diabetes self-management intervention                                                                                                                      | 6 and 12 months           | HbA1c: Int. 11.81%, SD 3.00 vs. Con. 11.80% SD 3.02; Cholesterol: 211.83 vs. 203.57; BMI: 32.33 (5.97) vs. 32.12 (6.35).<br>Insulin use: 20% vs 21%                                                                 | At 12 months: HbA1c 10.89% SD 2.56 vs. 11.64%, SD 2.85; Cholesterol: 189.88 vs. 187.64; BMI 32.17 (6.45) vs. 32.28 (6.52)                                                                                                                                                                       | Study confirmed effectiveness of culturally competent diabetes self-management education among Mexican Americans                                                            |
| Brown et al., 2005, USA      | Compare two diabetes self-management interventions designed for Mexican Americans: "extended" (24 h of education, 28 h of support groups) and "compressed" (16 h of education, 6 h of support groups). | 12 months                 | HbA1c: Compressed: 11.8 3.4 (114); Extended: 11.5 3.5 (102); Knowledge levels: 14.7 3.4 (114) vs. 14.9 3.2 (102); BMI: 32.2 (5.8) vs. 32.9 (8.3)<br>Insulin use: 5.3% vs 6.3%                                       | 12 months: HbA1c: Compressed: 11.1 3.2 (96); Extended: 10.5 3.0 (89); Knowledge levels: 16.0 3.4 (97) vs. 16.4 3.0 (89)                                                                                                                                                                         | Both culturally competent diabetes self-management education interventions were effective in promoting improved metabolic control and diabetes knowledge                    |

|                                      |                                                                                                                                         |                                   |                                                                                                                                                                                                              |                                                                                                                                                                                                                                                                                                                                                                              |                                                                                                                                              |
|--------------------------------------|-----------------------------------------------------------------------------------------------------------------------------------------|-----------------------------------|--------------------------------------------------------------------------------------------------------------------------------------------------------------------------------------------------------------|------------------------------------------------------------------------------------------------------------------------------------------------------------------------------------------------------------------------------------------------------------------------------------------------------------------------------------------------------------------------------|----------------------------------------------------------------------------------------------------------------------------------------------|
| O'Hare et al., 2004, UK              | Determine effectiveness of enhanced care of diabetes to improve risk factors for diabetic vascular complications                        | 12 months                         | HbA1c (%): 7.8 (1.9) vs 8.1 (2.1); SBP: 146.3 (21.7) vs 143.8 (21.7); DBP: 82.8 (10.8) vs 80.7 (11.3)<br>Insulin use: Int. 17% vs. Cont. 21%                                                                 | HbA1c (%): 7.57 (1.42) vs 7.9 (1.54); SBP: 139.6 (21.24) vs 141.7 (17.4); DBP: 79.7 (10.6) vs 80.4 (10.0)                                                                                                                                                                                                                                                                    | Support from link worker and diabetes nurse along with treatment protocol would help improving diabetes self-management                      |
| Bellary et al., 2008, UK             | Determine effectiveness of culturally sensitive enhanced care package to improve risk factors for diabetic vascular complications       | 24 months                         | HbA1c (%): 8.2 (1.9) vs 8.2 (1.8); SBP: 139.4 (21.1) vs 141.1 (20.3); DBP: 82.9 (11.0) vs 83.8 (11.1)<br>Insulin use: Int. 19% vs. Cont. 21%                                                                 | HbA1c (%): 8.1 vs 8.1; SBP: 138.0 vs 140.8; DBP: 80.6 (11.0) vs 81.9 (11.1)                                                                                                                                                                                                                                                                                                  | Support from link worker and diabetes nurse along with treatment protocol would help improving diabetes self-management                      |
| Middelkoop et al., 2001, Netherlands | Assessing effectiveness of culturally appropriate intervention to improve HbA1c and lipid profiles.                                     | 6 months with 12 months follow up | HbA1c: 8.4% vs. 8.2%                                                                                                                                                                                         | Int. group reduced HbA1c level of 0.29% vs. moderate results in waiting list participants. HbA1c changes (Int. vs. Waiting list at 0.42%)<br>Int. group decreased BMI by 0.04.<br>After 1 year, the lipid profile improved; total cholesterol decreased by 0.56 mmol/l, total cholesterol-to-HDL ratio decreased by 0.54 mmol/l, and triglycerides decreased by 0.34 mmol/l. | Nursing staff play significant roles to improving HbA1c levels and other key outcome variables.                                              |
| Islam et al., 2018, USA              | Examine the efficacy of a CHW-led patient-centered lifestyle intervention on type 2 diabetes management among Bangladeshis in NYC, USA. | 6 months follow up                | HbA1C: Int. 7.7 (7.6–7.9) vs. Cont. 8.0 (7.8–8.2)<br>Cholesterol: 159.1 (150.9–167.3) vs 155.1 (147.0–163.1)<br>BMI: 26.9 (26.3–27.5) vs. 27.0 (26.3–27.6)<br>PA (weekly): Int. 99.7 min vs. Cont. 176.9 min | Int. group reduced mean HA1C by 0.2% vs. no changes in control group<br>Int. group reduced cholesterol level by 10.6 mg/dL vs. 0.6 mg/dL in control group<br>Int. group reduced BMI by -0.4 vs control group -0.2 kg/m2                                                                                                                                                      | CHW-led culturally tailored intervention was effective in improving patient centred outcomes among Bangladeshi migrants with Type 2 diabetes |

RCT: Randomized controlled trial; Int.: Intervention; Cont.: Control; DM: Diabetes mellitus; T2DM: Type 2 diabetes mellitus; PA: Physical activity; CHW: Community health worker; HbA1c: Hypoglycaeted haemoglobin; LDL: Low-density lipoproteins; HDL: High-density lipoproteins; SBP: Systolic blood pressure; DBP: Diastolic blood pressure; BMI: Body mass index
